# Supplementary material for: Transcriptome analysis of avian reovirus-mediated changes in gene expression of normal chicken fibroblast DF-1 cells
Source: PubMed Central journal article supplement (PMC5702118; doi:10.1186/s12864-017-4310-5), 2017-11-25

# Cluster analysis of differentially expressed genes

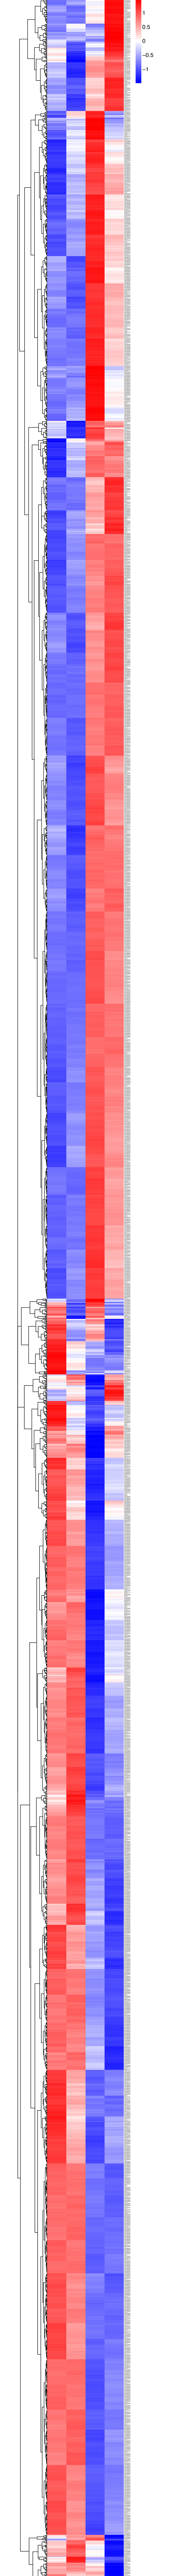

Supplement: 12864_2017_4310_MOESM2_ESM.pdf [file 12864_2017_4310_MOESM2_ESM.pdf]
